# Supplementary material for: Changing trends in elephant camp management in northern Thailand and implications for welfare
Source: PeerJ journal article supplement (doi:10.7717/peerj.5996), 2018-11-23
Supplement: Supplement_1.pdf [file Supplement_1.pdf]

## Supplement 1

Questionnaire sheet used to record information during camp visits

Name of interviewer .....

Name of interviewee ..... position.....

Date.....

### Section 1. Camp and elephant information

Camp name .....

Address .....

Years of operation .....

- Location:
- close to village  no  yes
  - close to main road  no  yes
  - close to river/stream  no  yes
  - close to forest  no  yes: type of forest .....
  - close to agricultural area  no  yes: specify .....
  - close to industry area  no  yes: specify .....

#### Activity with elephants

- riding with a saddle  riding bareback  no riding  elephant show
- free movement  feeding  bathing  others .....

#### Other activities

- ox-cart riding  bamboo rafting  rubber rafting  visiting hill tribe villages
- trekking  zip lines  restaurant  gift shop  others .....

#### Program for tourists

- half day  full day: How many days? ..... days
- overnight  others .....

#### Other animals in the camp

- no  yes:  ox  buffalo  dog  cat  chicken  others .....

Elephant number ..... elephants

- male: How many? ..... elephants
- female: How many? ..... elephants

## Age of elephants

| Age (years)                      | Number of elephants |        |
|----------------------------------|---------------------|--------|
|                                  | Male                | Female |
| <input type="checkbox"/> 0 - 3   |                     |        |
| <input type="checkbox"/> 4 - 10  |                     |        |
| <input type="checkbox"/> 11 - 20 |                     |        |
| <input type="checkbox"/> 21 - 30 |                     |        |
| <input type="checkbox"/> 31 - 40 |                     |        |
| <input type="checkbox"/> 41 - 55 |                     |        |
| <input type="checkbox"/> > 55    |                     |        |

## Owner of elephants

- camp: How many elephants? ..... elephants
- mahout: How many elephants? ..... elephants
- others: How many elephants? ..... elephants

## Section 2. Elephant management

### Working

|                |                     |                  |
|----------------|---------------------|------------------|
| Operation time | normal              | start time ..... |
|                |                     | end time .....   |
|                | high tourist season | start time ..... |
|                |                     | end time .....   |
|                | low tourist season  | start time ..... |
|                |                     | end time .....   |

## Walking

### Distance and duration of walking

| Type of work/activity                             | Distance/round<br>(meters) | Duration/round<br>(minutes) | Round/day (round) |                           |                          |
|---------------------------------------------------|----------------------------|-----------------------------|-------------------|---------------------------|--------------------------|
|                                                   |                            |                             | Normal            | High<br>tourist<br>season | Low<br>tourist<br>season |
| <input type="checkbox"/> riding with a saddle     |                            |                             |                   |                           |                          |
| <input type="checkbox"/> riding bareback          |                            |                             |                   |                           |                          |
| <input type="checkbox"/> no riding                |                            |                             |                   |                           |                          |
| <input type="checkbox"/> elephant show            |                            |                             |                   |                           |                          |
| <input type="checkbox"/> free movement            |                            |                             |                   |                           |                          |
| <input type="checkbox"/> others: specify<br>..... |                            |                             |                   |                           |                          |

### Walking trail

| Type of work/activity                             | Type of trail                      |                  |                   |                   |                  |                 |
|---------------------------------------------------|------------------------------------|------------------|-------------------|-------------------|------------------|-----------------|
|                                                   | Floor<br>(ground/<br>concrete/etc. | Flat<br>(yes/no) | Slope<br>(yes/no) | River<br>(yes/no) | Road<br>(yes/no) | Others<br>..... |
| <input type="checkbox"/> riding with a saddle     |                                    |                  |                   |                   |                  |                 |
| <input type="checkbox"/> riding bareback          |                                    |                  |                   |                   |                  |                 |
| <input type="checkbox"/> no riding                |                                    |                  |                   |                   |                  |                 |
| <input type="checkbox"/> elephant show            |                                    |                  |                   |                   |                  |                 |
| <input type="checkbox"/> free movement            |                                    |                  |                   |                   |                  |                 |
| <input type="checkbox"/> others: specify<br>..... |                                    |                  |                   |                   |                  |                 |

(If you have a riding bareback program)

How many elephants in this program? ..... elephants: male ..... female .....

How many tourists per elephant? ..... persons

Where can tourists sit on the elephant?  neck  back

Where are mahouts?  sit on a neck  sit on a back  walk with elephants

Are elephants attached by a cinch?

no  yes: What type?  rope  rubber tube  others .....

How long of this program? ..... minutes/hours

(If you have a riding with a saddle program)

How many elephants in this program? ..... elephants: male ..... female .....

How many tourists per elephant? ..... persons

What are saddles made from?

wood: How many weight? ..... kg

metal: How many weight? ..... kg

rattan: How many weight? ..... kg

others ..... How many weight? ..... kg

What types of bedding?  gunnysack  hammered bark of tree  blanket

sponge  plastic  others .....

How many weight of bedding? ..... kg

What equipment are used to tie saddles?  rope  rubber tube  others .....

Where do you tie equipment to elephants?  neck  chest  tail

Are saddles removed during break time?  no  yes: How long? .....

How long of this program? ..... minutes/hours

(If you have a no riding program)

How many elephants in this program? ..... elephants: male ..... female .....

How many tourists per elephant? ..... persons

How long of this program? ..... minutes/hours

(If you have an elephant show)

How many elephants in this program? ..... elephants: male ..... female .....

How many tourists per round? ..... persons

How long of a show? ..... minutes

What kind of activities in a show?

open mouth  playing musical instruments

sit  kicking soccer balls

lie down  dancing to music

lift up a leg  painting

raise a trunk  demonstrating logging skill

others .....

(If you have a free movement program)

How many elephants in this program? ..... elephants: male ..... female .....

How many tourists per round? ..... persons

How far of tourists from elephants? ..... meters

Can tourists touch elephants?  no  yes

How can mahouts control their elephant? .....

How long of this program? ..... minutes

Break time

| Type of work/activity                             | Break time                               |                     |
|---------------------------------------------------|------------------------------------------|---------------------|
|                                                   | When?<br>(at noon, between rounds, etc.) | How long? (minutes) |
| <input type="checkbox"/> riding with a saddle     |                                          |                     |
| <input type="checkbox"/> riding bareback          |                                          |                     |
| <input type="checkbox"/> no riding                |                                          |                     |
| <input type="checkbox"/> elephant show            |                                          |                     |
| <input type="checkbox"/> free movement            |                                          |                     |
| <input type="checkbox"/> others: specify<br>..... |                                          |                     |

Equipment used during working

Do you have any equipment to control elephants during working?  no  yes:

| Type of equipment                                 | How many elephants? |                               |
|---------------------------------------------------|---------------------|-------------------------------|
|                                                   | Every elephants     | Some elephants: specify ..... |
| <input type="checkbox"/> hook                     |                     |                               |
| <input type="checkbox"/> nail                     |                     |                               |
| <input type="checkbox"/> knife                    |                     |                               |
| <input type="checkbox"/> slingshot                |                     |                               |
| <input type="checkbox"/> chain                    |                     |                               |
| <input type="checkbox"/> others: specify<br>..... |                     |                               |

Do elephants have a day off?  no  yes: specify .....

Is there any injury/problem caused from working?

- no  yes: cause  restraint equipment  elephant fight  
 saddle equipment  weakness from workload  
 walking trail  others .....

**Rest area**

Rest area during daytime

| Type of rest area                                 | Movement<br>(chain/no chain) | Floor type<br>(ground/concrete/others) | How many<br>elephants? |
|---------------------------------------------------|------------------------------|----------------------------------------|------------------------|
| <input type="checkbox"/> conventional housing     |                              |                                        |                        |
| <input type="checkbox"/> enclosure                |                              |                                        |                        |
| <input type="checkbox"/> under tree               |                              |                                        |                        |
| <input type="checkbox"/> open space               |                              |                                        |                        |
| <input type="checkbox"/> grass field              |                              |                                        |                        |
| <input type="checkbox"/> others: specify<br>..... |                              |                                        |                        |

Rest area during nighttime

| Type of rest area                                 | Movement<br>(chain/on chain) | Floor type<br>(ground/concrete/others) | How many<br>elephants? |
|---------------------------------------------------|------------------------------|----------------------------------------|------------------------|
| <input type="checkbox"/> conventional housing     |                              |                                        |                        |
| <input type="checkbox"/> enclosure                |                              |                                        |                        |
| <input type="checkbox"/> under tree               |                              |                                        |                        |
| <input type="checkbox"/> open space               |                              |                                        |                        |
| <input type="checkbox"/> grass field              |                              |                                        |                        |
| <input type="checkbox"/> others: specify<br>..... |                              |                                        |                        |

(If you have housing)

What are housing made of?  wood  concrete  metal  others .....

Height ..... meters

Roof type:  zinc  tile  grass  others .....

Can water drain out easily?  no  yes

Is there any rough surface?  no  yes

(If you have the enclosure)

How large of enclosures? ..... square meters

How many elephants in each enclosure? ..... elephants

How do you clean rest areas?

remove dung: How often? .....

wash: How often? .....

scrub: How often? .....

### **Chaining**

(If you chain elephants)

Length of chain during daytime ..... meters

Length of chain during nighttime ..... meters

Size of chain ..... unit

What kind of materials you chain elephants to?  pin  pole  tree  others .....

## Nutrition

Type, source, freshness and storage of food

| Type                                                                                  | Source | Freshness | Storage |
|---------------------------------------------------------------------------------------|--------|-----------|---------|
| <input type="checkbox"/> grass: specify type<br>.....                                 |        |           |         |
| <input type="checkbox"/> corn stalk                                                   |        |           |         |
| <input type="checkbox"/> pineapple stalk                                              |        |           |         |
| <input type="checkbox"/> bamboo                                                       |        |           |         |
| <input type="checkbox"/> hey                                                          |        |           |         |
| <input type="checkbox"/> banana                                                       |        |           |         |
| <input type="checkbox"/> sugar cane                                                   |        |           |         |
| <input type="checkbox"/> sticky rice                                                  |        |           |         |
| <input type="checkbox"/> tamarind                                                     |        |           |         |
| <input type="checkbox"/> pellet feed                                                  |        |           |         |
| <input type="checkbox"/> others: specify<br>.....<br>.....<br>.....<br>.....<br>..... |        |           |         |



## Feeding

| Elephant category          | Type of food | Amount/day | Times/ day | Amount/time |
|----------------------------|--------------|------------|------------|-------------|
| Pre-wean                   |              |            |            |             |
| Young<br>(wean – 10 years) |              |            |            |             |
| Adult males                |              |            |            |             |
| Adult females              |              |            |            |             |
| Old<br>(> 55 years)        |              |            |            |             |
| Musth                      |              |            |            |             |
| Pregnant                   |              |            |            |             |

## Free foraging

- no: Why? .....
- yes: Where?       forest  grass field  others .....
- When?       daytime  nighttime  others .....
- How often?     every day  others .....
- How many elephant? ..... elephants

## Water

### Water for bathing

- Source of water       river/stream  underground water  
 tap water  others .....
- Water processing     no process  filtration  others .....

### Water for drinking

- Source of water       river/stream  underground water  
 tap water  others .....
- Water processing     no process  filtration  others .....

Where do elephants drink water?  river/stream  pond  bucket  
 tap  others .....

Do you clean water containers?  no  yes: How often? .....

How can elephant drink water during daytime? .....

How can elephant drink water during nighttime? .....

How many times elephant can drink water? ..... times/day

## Health care

### Bathing

How often do mahouts bath their elephants? ..... times/day

When do mahouts bath their elephants? .....

### Healthcare staff

no  yes:  veterinarian How many? .....

animal husbandman How many? .....

vet nurse How many? .....

others ..... How many? .....

### Elephant clinic

no  yes

### Medicine and equipment

wound dressing  supplement

eye drops  systemic antibiotic

local anti-inflammation  systemic anti-inflammation

foot trimming  others .....

### What do you do if you have sick elephants?

treat by camp staffs

consult : Who? .....

contact mobile clinic: Which one? .....

send elephants to a hospital: Where? .....

Transportation:  camp's truck  hired truck

### Health supplement

no  yes:  commercial herbs  herbs from forest  vitamin  others .....

Annual health check program

- no  yes:  by camp: How often? ..... times/year  
What program? .....
- by government staffs: How often? ..... times/year  
What program? .....

Deworming program

- no  yes: How many times? ..... times/year

Vaccination program

- no  yes: What kind of vaccine? .....
- How many times? ..... times/year

Foot care

- no  yes: How? .....
- How often? .....

Quarantine

- no  yes: How? .....
- How long? ..... days
- Program:  deworming  vaccination  blood test  others .....

**Breeding**

Breeding elephant

- no  yes: bull ..... elephants  
dam ..... elephants

Breeding program

- no: Why? .....
- yes

(If you have breeding program)

At what age do you start to breed elephants? ..... years old

Heat detection

- no  yes: How?  by mahouts
- by breeding bulls:  direct detection  from urine samples
- by hormone level

What do you do if females are considered to be in estrus?

- breed in the camp during free time/after work
- stop working and separate to breed:          Where? .....  
                                                                                                 How long? ..... days
- others .....

Do breeding elephants have a chance to be together?

- no    yes: How? .....

Do you bring your elephants to breed at other camps?

- no    yes: Where? .....

Do you bring elephants from other camps to breed at your camp?

- no    yes: from where? .....

Do breeding elephants work the same as other elephants?

- yes    no:    not work    work less than other elephants: specify .....

(If you have adult females at the age of 15-25 years old)

Have they ever breed?

- no    yes:   How many? ..... elephants
- not found pregnant
- considered pregnant: How may? ..... elephants

How many calves that born from camp breeding program? ..... elephants

How many calves that born from camp breeding program in the last 5 years? ..... elephants

Breeding record:

- no    yes:    date    name of breeding elephants
- number of breeding    others .....

### **Pregnant and baby elephant**

Have you had pregnant elephants and/or calves?    no    yes

(If you have had pregnant elephants and/or calves)

How do you know that elephants are pregnant?

- physical changes:    breast    abdomen    others .....
- behavioral changes: specify .....
- hormone level: by who? .....
- ultrasound: by who? .....

Is there any staff who have experience about pregnant elephants and calves?

- no    yes:   How many? ..... staffs

Pedigree

- no  yes

How do pregnant elephants work?

- work normally until parturition
- stop working: At what stage? .....
- reduce workload: How? .....  
At what stage? .....

Specific zone for parturition

- no  yes: Where? .....

Helper mother during parturition

- no  yes

Staff during parturition

- no  yes

Problem about pregnant elephants and calves in the last 5 years

- no  yes:  dystocia: How many cases? ..... cases  
predisposing cause .....
- stillbirth: How many cases? ..... cases  
predisposing cause .....
- calve rejection: How many cases? ..... cases  
predisposing cause .....
- others .....

Nursery zone

- no  yes: Where? .....
- Is there a fence?  no  yes

Weaning

- no  yes: How old? ..... years old

Do you separate calves from mothers?

- no  yes: How old? ..... years old  
Procedure .....

## Training

- no  yes: How old? ..... years old  
How long? ..... months  
Who is a trainer? .....  
What are training tasks? .....  
Have you found any problem from training? .....

## Health problem in calves

- no  yes:  diarrhea  bloat  constipation  skin problem  wound  
 eye problem  EEHV  others .....

## Old elephant

Have you had old elephants?  no  yes

(If you have had old elephants)

Do old elephants work the same as other elephants?

- yes  no:  not work  
 work less than other elephants: specify .....  
 work in different program: specify .....  
 others .....

## Health problems

- no  yes:  bloat  constipation  skin problems  wound  
 foot problem  stiffness  arthritis  abnormal gait  
 cataract  blindness  tooth lost  others .....

## Retired elephant

Have you had retired elephants?  no  yes

(If you have had retired elephants)

How many retired elephants? ..... elephants

Where do they live? .....

Do they have chance to exercise?  no  yes: How? .....

## Musth elephant

Have you had musth elephants?  no  yes

(If you have had musth elephants)

What do you do when elephants are considered to be in musth condition?

- breed
- stop working
- separate to a specific zone: Where? .....
  - How do they eat food? .....
  - How do they drink water? .....
  - chain:  no  yes: How long? ..... meters
  - other equipment:  no  yes: specify .....
  - How long? .....
- others .....

Is there any plan for emergency cases?

- no  yes:
  - sedative
  - dart gun and equipment
  - experienced staffs
  - others .....

Musth record

- no  yes:  date  duration  signs  others .....

### Section 3. Mahout management

Number of mahouts ..... mahouts

- permanent (regular) mahout ..... mahouts
- reserve mahout ..... mahouts

Number of mahout per elephant .....

Do you have enough mahouts?

- yes  no: Why? .....

Ethnic of mahouts

- native of Thailand
- ethnic groups of Thailand: specify .....
- native of Myanmar
- ethnic groups of Myanmar: specify .....
- others .....

Benefit

Salary ..... baht/month

Other income:  tips: How much? .....  
 round of working: How much? .....  
 others .....

Insurance  no  yes: specify .....

Health check  no  yes: specify .....

Others .....

Day off

no  yes: How many?..... days/month

What are important criteria for mahout employment?

- used to be a mahout
- recommended from reliable persons
- can communicate in Thai language
- have a legal document (for ethnic groups)
- others .....

Have you sent mahouts to join training courses?

- no: Why? .....
- yes: What courses? .....
- How often? .....

Rule .....

Punishment .....
