# Supplementary material for: Changing trends in elephant camp management in northern Thailand and implications for welfare
Source: PeerJ. 2018 Nov 23;6:e5996. doi: 10.7717/peerj.5996 (PMC6254247; doi:10.7717/peerj.5996)
Supplement: Supplemental Information 2 — Raw data for Tables 1–7. [file peerj-06-5996-s002.xlsx]

## Sheet: Table1
Camp No.	Years of Operation	Size of Camp	Male	Female				Years of Operation						Years of Operation
1	15	Large	9	25		Size of Camp	N of Camp	0-5	6-15	>16		Sex	N of Elephant	0-5	6-15	>16
2	9	Large	7	39		Small	16	7	5	4		Male	156	20	43	93
3	27	Large	21	45		Medium	10	3	5	2		Female	471	63	251	157
4	29	Large	22	30		Large	7	0	4	3				83	294	250
5	14	Large	6	62				10	14	9
6	40	Large	35	41
7	15	Small	1	5
8	2	Medium	2	8				Years of Operation						Years of Operation
9	2	Small	2	5		Size of Camp	N of Camp	0-5	6-15	>16		Sex	N of Elephant	0-5	6-15	>16
10	10	Medium	2	13		Small	16	70	35.7143	44.4444		Male	156	24.0964	14.6259	37.2
11	5	Small	2	3		Medium	10	30	35.7143	22.2222		Female	471	75.9036	85.3741	62.8
12	10	Small	3	3		Large	7	0	28.5714	33.3333
13	5	Small	1	8
14	2	Small	0	4
15	10	Small	0	5
16	20	Medium	4	8
17	10	Large	7	43
18	13	Medium	4	8
19	17	Small	0	8
20	12	Medium	1	12
21	12	Medium	2	9
22	5	Small	3	4
23	26	Small	1	5
24	1	Small	1	5
25	1	Medium	0	10
26	1	Small	2	7
27	41	Medium	10	15
28	1	Medium	7	9
29	10	Medium	1	20
30	24	Small	0	3
31	19	Small	0	2
32	15	Small	0	4
33	9	Small	0	3

## Sheet: Table2
Camp No.	Camp Owner	Remote Owner	Mahout Owner	Years of Operation	Size of Camp				Ownership						Ownership
1	20	0	14	15	Large		Years of Operation	Nof Elephant	Camp	Remote Owner	Mahout		Size of Camp	N of Elephant	Camp	Remote Owner	Mahout
2	44	1	1	9	Large		0-5	83	31	22	30		Small	90	53	26	11
3	36	8	22	27	Large		6-15	294	231	52	11		Medium	145	75	39	31
4	15	0	37	29	Large		>16	250	171	67	12		Large	392	305	76	11
5	68	0	0	14	Large				433	141	53				433	141	53
6	76	0	0	40	Large
7	3	0	3	15	Small
8	2	8	0	2	Medium				Ownership						Ownership
9	0	0	7	2	Small		Years of Operation	Nof Elephant	Camp	Remote Owner	Mahout		Size of Camp	N of Elephant	Camp	Remote Owner	Mahout
10	7	3	5	10	Medium		0-5	83	7.15935	15.6028	56.6038		Small	90	12.2402	18.4397	20.7547
11	1	3	1	5	Small		6-15	294	53.3487	36.8794	20.7547		Medium	145	17.321	27.6596	58.4906
12	6	0	0	10	Small		>16	250	39.4919	47.5177	22.6415		Large	392	70.4388	53.9007	20.7547
13	8	1	0	5	Small
14	4	0	0	2	Small
15	2	0	3	10	Small
16	8	4	0	20	Medium
17	46	2	2	10	Large
18	2	0	10	13	Medium
19	4	0	4	17	Small
20	10	0	3	12	Medium
21	11	0	0	12	Medium
22	7	0	0	5	Small
23	2	0	4	26	Small
24	0	2	4	1	Small
25	5	4	1	1	Medium
26	4	5	0	1	Small
27	25	0	0	41	Medium
28	0	7	9	1	Medium
29	5	5	11	10	Medium
30	3	0	0	24	Small
31	2	0	0	19	Small
32	4	0	0	15	Small
33	3	0	0	9	Small

## Sheet: Table3
Camp No.	Type of Work	Size of Camp	Male	Female				Type of Work
1	Riding Bareback	Large	9	25		Size of Camp	N of Camp	Riding with a Saddle	Riding with a Saddle and Show	Riding Bareback	Riding with a Saddle and Riding Bareback	No Riding	Observation
2	Riding Bareback	Large	7	39		Small	16	4	0	5	3	4	0
3	Riding with a Saddle and Show	Large	21	45		Medium	10	3	1	3	2	1	0
4	Riding with a Saddle and Show	Large	22	30		Large	7	0	4	2	0	0	1
5	Observation	Large	6	62				7	5	10	5	5	1
6	Riding with a Saddle and Show	Large	35	41
7	Riding with a Saddle	Small	1	5
8	Riding Bareback	Medium	2	8				Type of Work
9	No Riding	Small	2	5		Size of Camp	N of Camp	Riding with a Saddle	Riding with a Saddle and Show	Riding Bareback	Riding with a Saddle and Riding Bareback	No Riding	Observation
10	Riding Bareback	Medium	2	13		Small	16	57.1429	0	50	60	80	0
11	Riding Bareback	Small	2	3		Medium	10	42.8571	20	30	40	20	0
12	Riding Bareback	Small	3	3		Large	7	0	80	20	0	0	100
13	Riding Bareback	Small	1	8
14	No Riding	Small	0	4
15	No Riding	Small	0	5		Sex	N of Elephants	Riding with a Saddle	Riding with a Saddle and Show	Riding Bareback	Riding with a Saddle and Riding Bareback	No Riding	Observation
16	Riding with a Saddle and Riding Bareback	Medium	4	8		Male	156	16	92	33	5	4	6
17	Riding with a Saddle and Show	Large	7	43		Female	471	59	168	114	37	31	62
18	Riding Bareback	Medium	4	8				75	260	147	42	35	68
19	Riding with a Saddle	Small	0	8
20	Riding with a Saddle	Medium	1	12
21	Riding with a Saddle	Medium	2	9		Sex	N of Elephants	Riding with a Saddle	Riding with a Saddle and Show	Riding Bareback	Riding with a Saddle and Riding Bareback	No Riding	Observation
22	Riding Bareback	Small	3	4		Male	156	21.3333	35.3846	22.449	11.9048	11.4286	8.82353
23	Riding with a Saddle	Small	1	5		Female	471	78.6667	64.6154	77.551	88.0952	88.5714	91.1765
24	Riding with a Saddle	Small	1	5
25	No Riding	Medium	0	10
26	No Riding	Small	2	7
27	Riding with a Saddle	Medium	10	15
28	Riding with a Saddle and Show	Medium	7	9
29	Riding with a Saddle and Riding Bareback	Medium	1	20
30	Riding Bareback	Small	0	3
31	Riding with a Saddle and Riding Bareback	Small	0	2
32	Riding with a Saddle and Riding Bareback	Small	0	4
33	Riding with a Saddle and Riding Bareback	Small	0	3

## Sheet: Table4
Camp No.	Years of Operation	Riding with a Saddle	Riding Bareback	No Riding	Show					Years of Operation
1	15	No	Yes	No	No		Variable		N of Camp	0-5	6-15	>16
2	9	No	Yes	No	No		Riding with a saddle	Yes	17	2	7	8
3	27	Yes	No	No	Yes			No	16	8	7	1
4	29	Yes	No	No	Yes					10	14	9
5	14	No	No	No	No		Riding bareback	Yes	15	4	8	3
6	40	Yes	No	No	Yes			No	18	6	6	6
7	15	Yes	No	No	No					10	14	9
8	2	No	Yes	No	No		No Riding	Yes	5	4	1	0
9	2	No	No	Yes	No			No	28	6	13	9
10	10	No	Yes	No	No					10	14	9
11	5	No	Yes	No	No		Show	Yes	5	1	1	3
12	10	No	Yes	No	No			No	28	9	13	6
13	5	No	Yes	No	No					10	14	9
14	2	No	No	Yes	No
15	10	No	No	Yes	No
16	20	Yes	Yes	No	No					Years of Operation
17	10	Yes	No	No	Yes		Variable		N of Camp	0-5	6-15	>16
18	13	No	Yes	No	No		Riding with a saddle	Yes	17	20	50	88.8889
19	17	Yes	No	No	No			No	16	80	50	11.1111
20	12	Yes	No	No	No		Riding bareback	Yes	15	40	57.1429	33.3333
21	12	Yes	No	No	No			No	18	60	42.8571	66.6667
22	5	No	Yes	No	No		No Riding	Yes	5	40	7.14286	0
23	26	Yes	No	No	No			No	28	60	92.8571	100
24	1	Yes	No	No	No		Show	Yes	5	10	7.14286	33.3333
25	1	No	No	Yes	No			No	28	90	92.8571	66.6667
26	1	No	No	Yes	No
27	41	Yes	No	No	No
28	1	Yes	No	No	Yes
29	10	Yes	Yes	No	No
30	24	No	Yes	No	No
31	19	Yes	Yes	No	No
32	15	Yes	Yes	No	No
33	9	Yes	Yes	No	No

## Sheet: Table5
Camp No.	Location	Years of Operation	Size of Camp	Type of Work	Time Work Start	Time Work Stop	Working Hours		Variable		N of Camp	Range of Time Work Start	Range of Time Work End	Mean Working Hours	SE Working Hours
1	Chiang Mai	15	Large	Riding Bareback	10:00:00	15:00:00	5		Location	Chiang Mai	26	07:00 - 10:30	12:00 - 17:00	6.06	0.279
2	Chiang Mai	9	Large	Riding Bareback	08:00:00	15:00:00	7			Chiang Rai	3	07:00 - 08:00	15:30 - 17:00	8.5	0.289
3	Chiang Mai	27	Large	Riding with a Saddle and Show	09:00:00	15:00:00	6			Mae Hong Son	4	07:00 - 09:00	17:00:00	9.25	0.479
4	Chiang Mai	29	Large	Riding with a Saddle and Show	07:00:00	14:30:00	7.5		Years of Operation	0-5	10	07:30 - 10:30	15:00 - 17:00	6.65	0.454
5	Chiang Mai	14	Large	Observation	09:30:00	15:00:00	5.5			>5-15	14	07:00 - 10:30	12:00 - 17:00	6.21	1.125
6	Chiang Mai	40	Large	Riding with a Saddle and Show	07:00:00	14:30:00	7.5			>15	9	07:00 - 09:30	14:30 - 17:00	7.39	0.341
7	Chiang Mai	15	Small	Riding with a Saddle	10:00:00	14:00:00	4		Size of Camp	Small	16	07:00 - 10:30	14:00 - 17:00	6.63	0.511
8	Chiang Mai	2	Medium	Riding Bareback	09:00:00	3:30 PK	6.5			Medium	10	07:00 - 10:00	12:00 - 17:00	6.8	0.583
9	Chiang Mai	2	Small	No Riding	10:00:00	15:00:00	5			Large	7	07:00 - 10:00	14:30 - 15:00	6.57	0.4
10	Chiang Mai	10	Medium	Riding Bareback	10:00:00	15:30:00	5.5		Type of Work	Riding with a Saddle	7	08:00 - 10:00	12:00 - 16:00	6	0.699
11	Chiang Mai	5	Small	Riding Bareback	08:00:00	16:00:00	8			Riding with a Saddle and Show	5	07:00 - 09:00	14:30 - 17:00	7.5	0.515
12	Chiang Mai	10	Small	Riding Bareback	09:30:00	14:30:00	5			Riding Bareback	10	07:00 - 10:30	14:30 - 17:00	6.2	0.429
13	Chiang Mai	5	Small	Riding Bareback	07:30:00	15:00:00	7.5			Riding with a Saddle and Riding Bareback	5	07:00 - 09:00	15:30 - 17:00	9.1	0.4
14	Chiang Mai	2	Small	No Riding	10:00:00	15:00:00	5			No Riding	5	07:00 - 10:30	14:00 - 16:30	5.5	0.671
15	Chiang Mai	10	Small	No Riding	10:30:00	14:00:00	3.5			Bathing only	1	09:30:00	15:00:00	5.5
16	Chiang Mai	20	Medium	Riding with a Saddle and Riding Bareback	09:00:00	17:00:00	8
17	Chiang Mai	10	Large	Riding with a Saddle and Show	07:30:00	15:00:00	7.5
18	Chiang Mai	13	Medium	Riding Bareback	10:00:00	15:00:00	5
19	Chiang Mai	17	Small	Riding with a Saddle	09:00:00	15:30:00	6.5
20	Chiang Mai	12	Medium	Riding with a Saddle	09:00:00	12:00:00	3
21	Chiang Mai	12	Medium	Riding with a Saddle	08:30:00	16:00:00	7.5
22	Chiang Mai	5	Small	Riding Bareback	10:30:00	15:00:00	4.5
23	Chiang Mai	26	Small	Riding with a Saddle	09:30:00	15:30:00	6
24	Chiang Mai	1	Small	Riding with a Saddle	08:30:00	15:30:00	7
25	Chiang Mai	1	Medium	No Riding	09:00:00	16:00:00	7
26	Chiang Mai	1	Small	No Riding	09:30:00	16:30:00	7
27	Chiang Rai	41	Medium	Riding with a Saddle	08:00:00	16:00:00	8
28	Chiang Rai	1	Medium	Riding with a Saddle and Show	08:00:00	17:00:00	9
29	Chiang Rai	10	Medium	Riding with a Saddle and Riding Bareback	07:00:00	15:30:00	8.5
30	Mae Hong Son	24	Small	Riding Bareback	09:00:00	17:00:00	8
31	Mae Hong Son	19	Small	Riding with a Saddle and Riding Bareback	08:00:00	17:00:00	9
32	Mae Hong Son	15	Small	Riding with a Saddle and Riding Bareback	07:00:00	17:00:00	10
33	Mae Hong Son	9	Small	Riding with a Saddle and Riding Bareback	07:00:00	17:00:00	10

## Sheet: Table6
Camp No.	Times per Day	Riding with a saddle				Riding Bareback				No Riding				Show				Type of Work	N of Camp	Mean Times per Day	Mean Distance per Round	Mean Time per Round	Mean Total Distance per Day	Mean Total Time per Day
		Distance per Round	Time per Round	Total Distance per Day	Total Time per Day	Distance per Round	Time per Round	Total Distance per Day	Total Time per Day	Distance per Round	Time per Round	Total Distance per Day	Total Time per Day	Total Time per Day	Time per Round	Total Time per Day		Ride with a Saddle	18	4.83333	1042.94	34.7222	4703.53	157.778
1	3	0	0	0	0	2000	30	6000	90	0	0	0	0	0	0	0		Ride Bareback	21	3.38095	1716.32	54.2105	4990.53	157.632
2	2	0	0	0	0	1000	40	2000	80	0	0	0	0	0	0	0		No Riding	10	2.4	1441.25	67.7778	3257.5	145.556
3	7	500	20	3500	140	400	10	2800	70	0	0	0	0	4	45	180		Show	6	4.2		43.75		190
4	5	1000	45	5000	225	200	30	1000	150	0	0	0	0	4	40	160
5	0	0	0	0	0	0	0	0	0	2000	30	0	0	0	0	0
6	10	500	20	5000	200	NA	NA	NA	NA	0	0	0	0	3	60	180		Type of work	N of camps	SE round per day	SE per round	SE per round	SE total distance per day	SE total time per day
7	3	1000	30	3000	90	1000	NA	3000	NA	NA	NA	NA	NA	0	0	0		Ride with a Saddle	18	0.531676	216.248	3.55793	841.697	17.2412
8	2	0	0	0	0	1000	40	2000	80	0	0	0	0	0	0	0		Ride Bareback	21	0.449742	276.946	8.55207	965.242	27.0541
9	2	0	0	0	0	4000	60	8000	120	0	0	0	0	0	0	0		No Riding	10	0.266667	392.64	17.3828	1044.66	34.2017
10	2	0	0	0	0	4000	120	8000	240	0	0	0	0	0	0	0		Show	6	1.0198		6.25		17.3205
11	3	0	0	0	0	1000	20	3000	60	0	0	0	0	0	0	0
12	2	30	10	60	20	10	25	20	50	0	0	0	0	2	NA	NA
13	3	0	0	0	0	2000	40	6000	120	0	0	0	0	0	0	0
14	1	0	0	0	0	0	0	0	0	3000	60	3000	60	0	0	0
15	1	0	0	0	0	0	0	0	0	1000	180	1000	180	0	0	0
16	3	NA	45	NA	135	NA	45	NA	135	NA	30	NA	90	0	0	0
17	6	2000	30	12000	180	0	0	0	0	0	0	0	0	NA	NA	NA
18	1	0	0	0	0	1000	30	1000	30	0	0	0	0	0	0	0
19	6	200	30	1200	180	0	0	0	0	0	0	0	0	0	0	0
20	3	3000	40	9000	120	0	0	0	0	0	0	0	0	0	0	0
21	8	1000	45	8000	360	0	0	0	0	0	0	0	0	0	0	0
22	2	0	0	0	0	2000	30	4000	60	0	0	0	0	0	0	0
23	6	400	30	2400	180	0	0	0	0	0	0	0	0	0	0	0
24	7	500	20	3500	140	0	0	0	0	0	0	0	0	0	0	0
25	2	0	0	0	0	0	0	0	0	30	10	60	20	0	0	0
26	2	0	0	0	0	0	0	0	0	500	30	1000	60	0	0	0
27	6	1500	30	9000	180	3000	60	18000	360	0	0	0	0	0	0	0
28	3	100	30	300	90	0	0	0	0	0	0	0	0	8	30	240
29	3	1000	20	3000	60	3000	150	9000	450	0	0	0	0	0	0	0
30	3	0	0	0	0	2000	120	6000	360	2000	120	6000	360	0	0	0
31	3	1000	60	3000	180	1000	60	3000	180	1000	60	3000	180	0	0	0
32	3	1000	60	3000	180	1000	60	3000	180	1000	60	3000	180	0	0	0
33	3	3000	60	9000	180	3000	60	9000	180	3000	60	9000	180	0	0	0

## Sheet: Table7
Camp No.	Chain only Night Time	Chain both Day and Night Time	Chain Length Day Time	Chain Length Night Time		Chain Time	N of Camp	Mean Chain Length Day Time	Mean Chain Length Night Time
1	No	Yes	3	3		Chain only Night Time	3	-	9
2	No	Yes	2	2		Chain both Day and Night Time	27	2.94	5.87
3	No	Yes	2	2
4	No	Yes	1.5	1.5
5	No	No				Chain Time	N of Camp	SE Chain Length Day Time	SE Chain Length Night Time
6	No	Yes	3	3		Chain only Night Time	3	-	5.6
7	No	Yes	1	1		Chain both Day and Night Time	27	0.7	1.4
8	No	Yes	5	5
9	No	Yes	1	20
10	No	Yes	4	4
11	No	Yes	20	5
12	No	Yes	3	3
13	No	Yes	1.5	1.5
14	No	No
15	No	No
16	No	Yes	2	2
17	No	Yes	1.5	1.5
18	No	Yes	5	5
19	No	Yes	4.5	4
20	No	Yes	4	4
21	No	Yes	1	1
22	No	Yes	2	2
23	No	Yes	1	24
24	No	Yes	2	10
25	Yes	No		2
26	Yes	No		5
27	No	Yes	1.5	1.5
28	No	Yes	1	2.5
29	No	Yes	2	30
30	Yes	No		20
31	No	Yes	1	2
32	No	Yes	2	3
33	No	Yes	2	15
